# Supplementary material for: One-step synthesis of hollow polymeric nanospheres: self-assembly of amphiphilic azo polymers via hydrogen bond formation
Source: Royal Society of Chemistry journal article supplement (doi:10.1039/c4ra06415a), 2014-01-01
Supplement: c4ra06415a1.pdf [file c4ra06415a1.pdf]

Electronic Supplementary Information for the journal of  
Soft matter

# One-Step Synthesis of Hollow Polymeric Nanospheres: Self-Assembly of Amphiphilic Azo Polymers Via Hydrogen Bond Formation

Taoran Zhang,<sup>a</sup> Cheng Jin,<sup>a</sup> Lingyu Wang<sup>a</sup> and Qinjian Yin<sup>a\*</sup>

<sup>a</sup>Key Laboratory of Green Chemistry and Technology and College of Chemistry, Sichuan University, Chengdu, 610064, China

## The preparation and characterization of CDB

We synthesized RAFT reagent CDB according to Figure 1S.

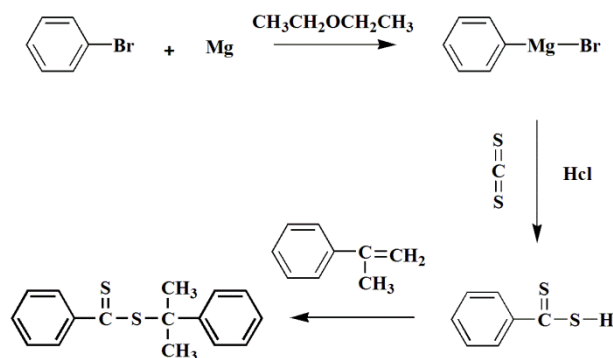

Fig 1S. Reaction scheme for synthesis of statistical RAFT reagent CDB.

<sup>1</sup>H NMR spectra (Fig 2s) and <sup>13</sup>C NMR (Fig 3s) spectra were recorded by a Bruker AV II-400 NMR spectrometer at room temperature.

---

\* Corresponding author: Tel.: +86 28 85418112; fax: +86 28 85412907. E-mail address: E-mail: changer@scu.edu.cn

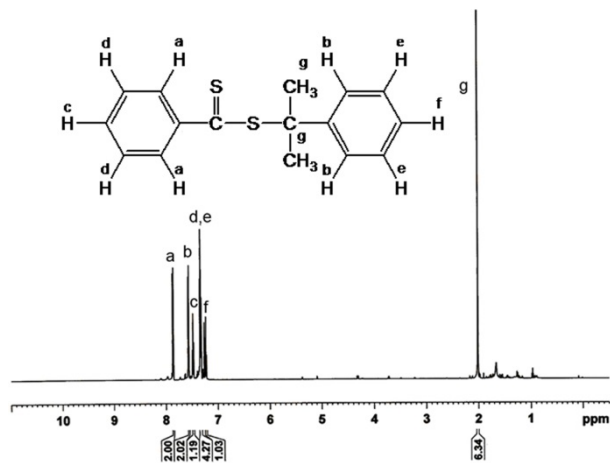

Figure S2.  $^1\text{H}$  NMR spectrum for the CDB chain transfer agents in  $\text{CDCl}_3$ .

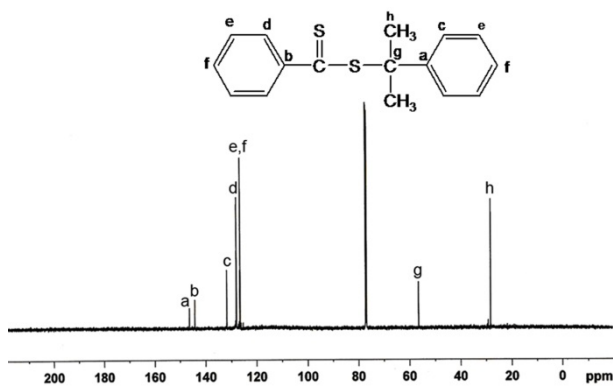

Figure S3.  $^{13}\text{C}$  NMR spectrum for the CDB chain transfer agents in  $\text{CDCl}_3$ .

Fourier transform infrared (FT-IR) absorption spectra were obtained with a Bruker Tensor 27 (Figure S4).

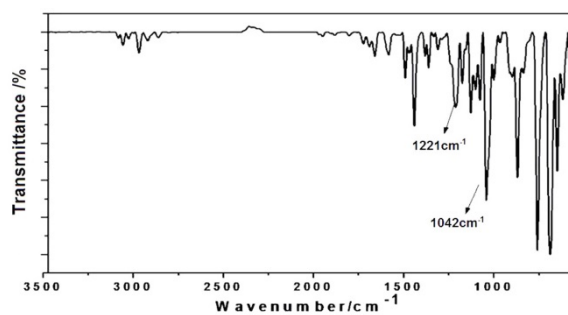

Figure S4. IR spectrum of cumyl dithiobenzoate.

The weight-average molecular weight ( $M_w$ ) and number-average molecular weight ( $M_n$ ) are 16803 and 13421 respectively (Figure S5).

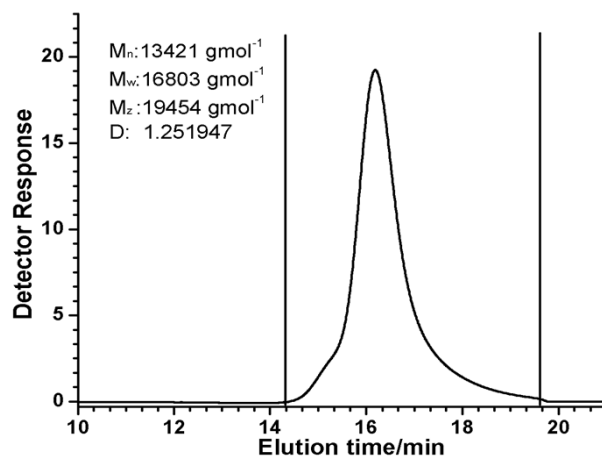

Figure S5. GPC trace for PAN-*stat*-P4VP synthesized by RAFT (DMF eluent).

Mixing a THF solution of MMR with that of PAN<sub>52</sub>-*stat*-P4VP<sub>101</sub> produced a transparent solution, in which MMR was expected to form through hydrogen bonds between the carboxyl group and the pyridine group of PAN<sub>52</sub>-*stat*-P4VP<sub>101</sub>. The formation of the hydrogen bonds is supported by <sup>13</sup>C NMR and IR spectroscopy measurements. For example, the signal of the carboxyl carbon of MMR solution in chloroform shifts from 170.92 to 169.12 ppm upon addition of PAN<sub>52</sub>-*stat*-P4VP<sub>101</sub> solution, which reflects that the self-association of the carboxyl is disrupted and an intermolecular hydrogen bond forms between the carboxyl hydroxyl group and the pyridyl group (Figure S6).

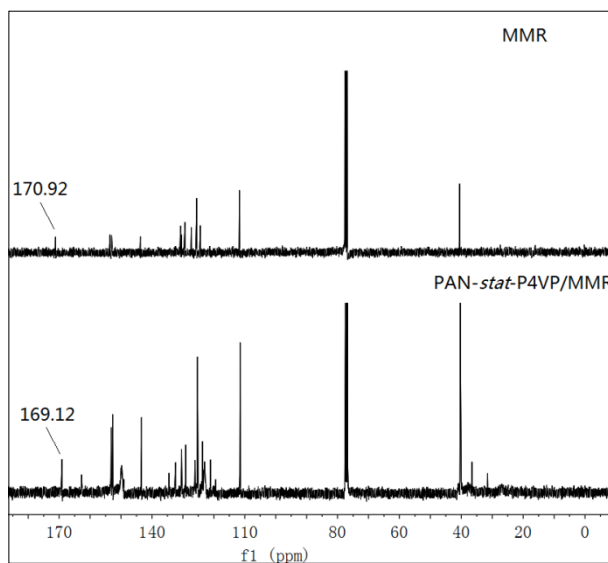

Figure S6. <sup>13</sup>C NMR results of MMR and the mixture of PAN<sub>52</sub>-*stat*-P4VP<sub>101</sub>/MMR<sub>41</sub> in CDCl<sub>3</sub>.
